# Supplementary material for: Three-roll milling exfoliated graphite nanoplatelets with semi-graphitized hard carbon by Ni-catalyzed pyrolysis of phenolic resin for high-performance sodium-ion batteries
Source: Royal Society of Chemistry journal article supplement (doi:10.1039/d4nr05481d), 2025-01-01
Supplement: d4nr05481d1.pdf [file d4nr05481d1.pdf]

## Supporting Information

### **Three-roll milling exfoliated graphite nanoplatelets with semi-graphitized hard carbon by Ni-catalyzed pyrolysis of phenolic resin for high-performance sodium-ion batteries**

Xin Wang,<sup>#</sup> Yabing Chen,<sup>#</sup> Conghang Yang,<sup>#</sup> Juntong Huang\*, Zhi Chen\*, Haijun Zeng, Yao Su, Li Chen

School of Materials Science and Engineering, Nanchang Hangkong University,  
Nanchang 330063, China

<sup>#</sup> These authors contributed equally to this study.

Email: [huangjuntong@163.com](mailto:huangjuntong@163.com); [chenzhi\\_2018@126.com](mailto:chenzhi_2018@126.com)

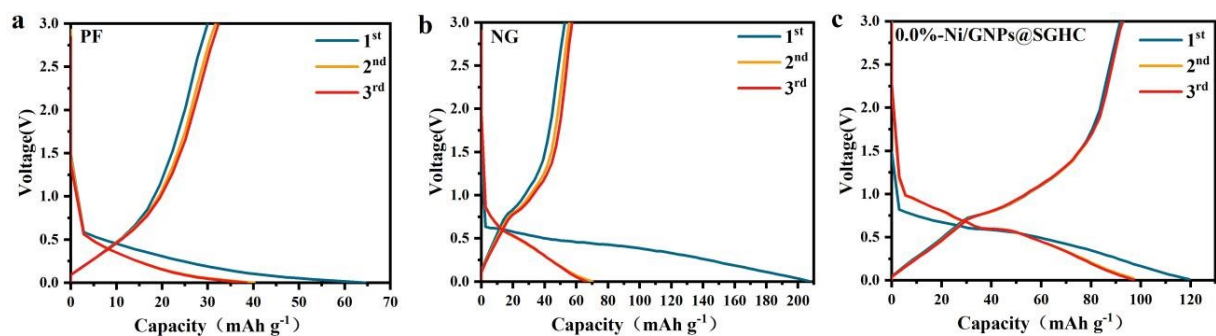

Figure S1 The discharge/charge curves of (a) PF, (b) NG, and (c) 0.0%-Ni/GNPs@SGHC at 1 A  $\text{g}^{-1}$

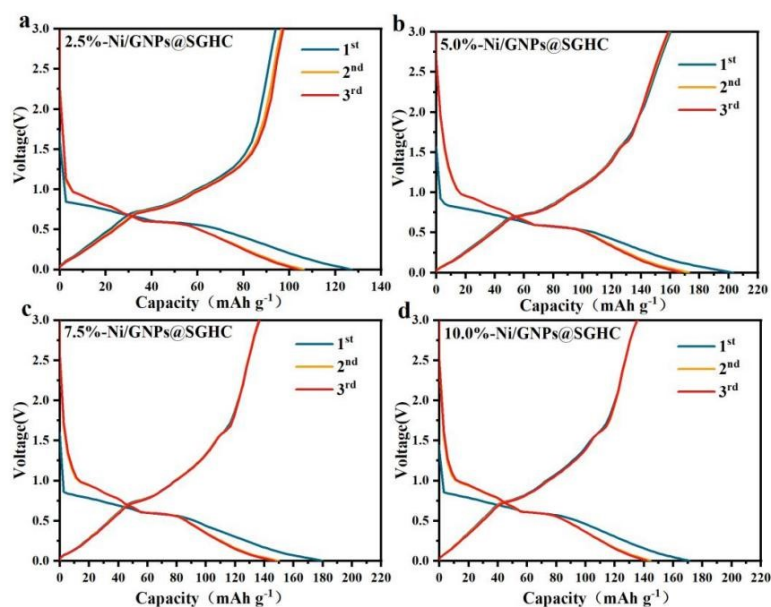

Figure S2 The discharge/charge curves of (a) 2.5%-Ni/GNPs@SGHC, (b) 5.0%-Ni/GNPs@SGHC, (c) 7.5%-Ni/GNPs@SGHC and (d) 10.0%-Ni/GNPs@SGHC at 1 A  $\text{g}^{-1}$

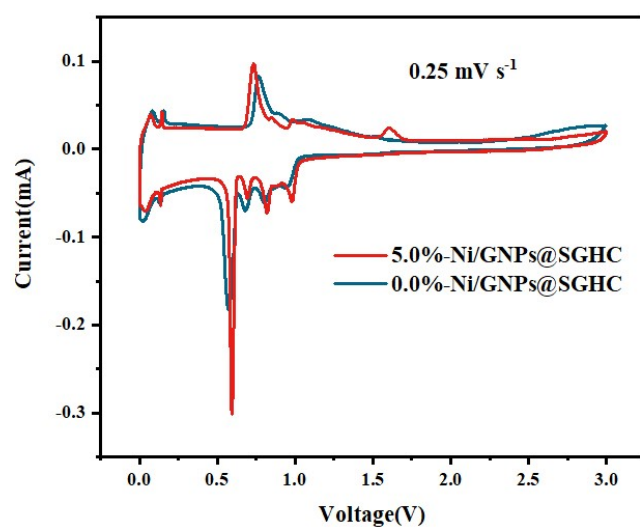

Figure S3 0.0% and 5.0%-Ni/GNPs@SGHC CV curve at 0.25  $\text{mV}^{-1}$
